# Supplementary material for: Nitrogen-doped carbocatalyst activated persulfate (PS) for oxidation polymerization of bisphenol A (BPA): importance of nonradical activation of PS
Source: Royal Society of Chemistry journal article supplement (doi:10.1039/d3cp00659j), 2023-01-01
Supplement: d3cp00659j1.pdf [file d3cp00659j1.pdf]

## Supplementary Materials

### **Nitrogen-doped carbocatalysts activated persulfate (PS) for oxidation polymerization of bisphenol A (BPA): Importance of nonradical activation of PS**

Caihong Wang<sup>a</sup>, Yong Liu<sup>a,b\*</sup>, Fengshen Han<sup>a</sup>, Yongzhe Han<sup>a</sup>, Tianyu Liu<sup>a</sup>, Haitao Ren<sup>c</sup>, , and Xu Han<sup>d\*</sup>

<sup>a</sup> *School of Chemistry and Chemical Engineering, Tianjin University of Technology, Tianjin, 300384, P.R. China*

<sup>b</sup> *Tianjin Key Laboratory of Organic Solar Cells and Photochemical Conversion, Tianjin, 300384, P.R. China*

<sup>c</sup> *School of Textile Science and Engineering, Tiangong University, Tianjin, 300387, P.R. China*

<sup>d</sup> *School of Chemical Engineering and Technology, Tianjin University, Tianjin, 300350, P.R. China*

Corresponding author:

Dr. Yong Liu

Dr. Xu Han

Tel: +86-13920202859; +86-15222072695

E-mail: [tjutliuyong@163.com](mailto:tjutliuyong@163.com); [xuhan@tju.edu.cn](mailto:xuhan@tju.edu.cn)

## Contents

|                                                                              |   |
|------------------------------------------------------------------------------|---|
| <b>Figure S1</b> XRD, SEM analysis of the synthesized CN.....                | 1 |
| <b>Figure S2</b> Oxidation of BPA by PS and CN-800 at pH 9.0.....            | 1 |
| <b>Table S1</b> Rate constants in the CN-800/PS/BPA system.....              | 2 |
| <b>Table S2</b> Rate constants in the oxidation of BPA by CN and PS.....     | 2 |
| <b>Figure S3</b> TOC variations in solution in the CN-800/PS/BPA system..... | 3 |
| <b>Table S3</b> Tafel parameters of before and after CN-800.....             | 3 |
| <b>Figure S4</b> Recycle use of CN-800 in the oxidation of BPA by PS.....    | 4 |
| <b>Figure S5</b> Oxidation of BPA in the presence of 50 mM BHT.....          | 4 |
| <b>Figure S6</b> Chronoamperometric analysis.....                            | 5 |
| <b>Table S4</b> XPS analysis of the CN-T samples.....                        | 5 |
| <b>Figure S7</b> XPS N 1s analysis of before and after CN catalyst.....      | 6 |
| <b>Figure S8</b> Adsorption of BPA by normal/poisoned CN-800.....            | 7 |



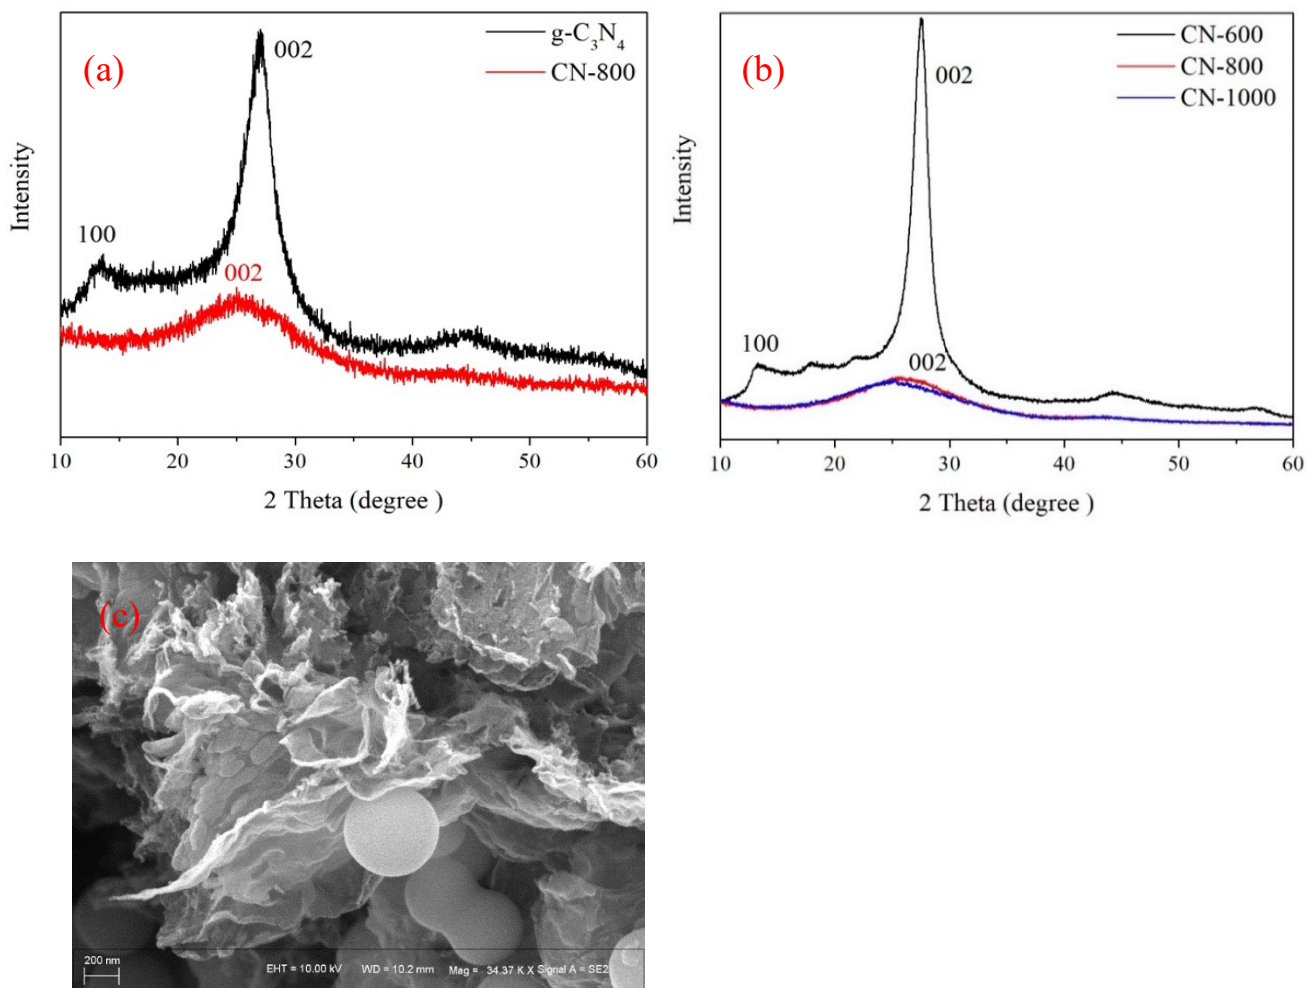

**Figure S1.** (a) and (b) XRD patterns of g-C<sub>3</sub>N<sub>4</sub>, CN-800, CN-600 and CN-1000; (c) SEM image of CN-800.

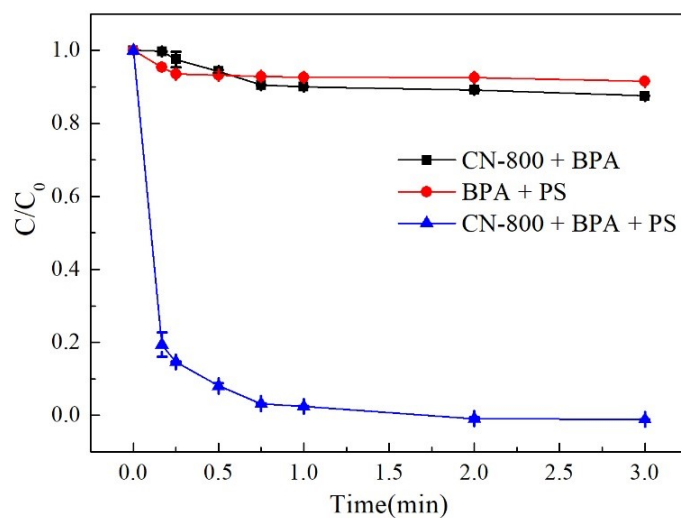

**Figure S2.** Oxidation of BPA by PS and CN-800 at pH 9.0. Conditions: [BPA] = 20 mg L<sup>-1</sup>, [PS] = 1.0 mM and [CN-800] = 0.2 g L<sup>-1</sup> at 25 ± 1 °C.

**Table S1.** Rate constants in the oxidation of BPA by 0.2 g L<sup>-1</sup> CN-800 and 1mM PS under different conditions.

| pH conditions | Scavengers | $k$ (min <sup>-1</sup> ) | $R^2$ |
|---------------|------------|--------------------------|-------|
| 7.0           | -          | 2.964                    | 0.933 |
| 8.0           | -          | 3.932                    | 0.916 |
| 9.0           | -          | 4.140                    | 0.915 |
| 10.0          | -          | 3.422                    | 0.969 |
| 9.0           | 50 mM BHT  | 0.060                    | 0.710 |

**Table S2.** Rate constants in the oxidation of BPA by 0.2 g L<sup>-1</sup> CN-T and 1mM PS.

| temperature | pH conditions | $k$ (min <sup>-1</sup> ) | $R^2$ |
|-------------|---------------|--------------------------|-------|
| 600         | 9.0           | 0.151                    | 0.645 |
| 800         | 9.0           | 4.140                    | 0.915 |
| 1000        | 9.0           | 5.055                    | 0.940 |

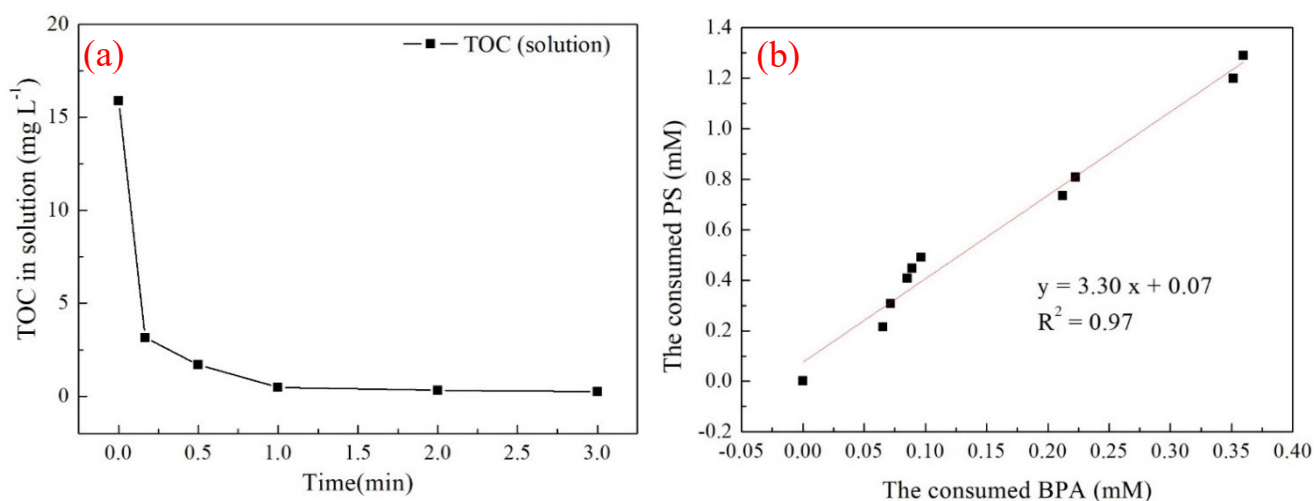

**Figure S3.** (a) TOC in solution in the CN-800/BPA/PS system. Conditions: [BPA] = 20 mg L<sup>-1</sup>, [PS] = 1.0 mM and [CN-800] = 0.2 g L<sup>-1</sup> at 25 ± 1 °C; (b) Molar ration of consumed PS and removed BPA in the CN-800/BPA/PS system.

**Table S3.** Tafel parameters of CN-800, CN-800/BPA, CN-800/PS and CN-800 after reaction

| parameters                                                         | CN-800 | CN-800/BPA | CN-800/PS | CN-800 after reaction |
|--------------------------------------------------------------------|--------|------------|-----------|-----------------------|
| Corrosion potential<br>( $E_{\text{corr}}$ , V)                    | 0.482  | 0.547      | 0.547     | 0.547                 |
| Corrosion current<br>( $J_{\text{corr}}$ , $\mu\text{A cm}^{-2}$ ) | 56.08  | 32.28      | 90.36     | 0.9688                |

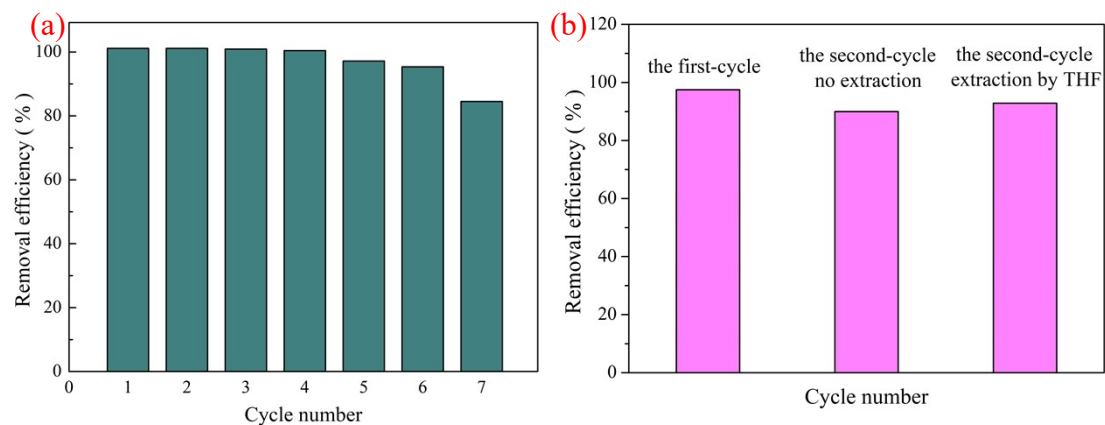

**Figure S4.** Recycle use of CN-800 in the oxidation of BPA by PS. Conditions: (a) [BPA] = 20 mg L<sup>-1</sup>, [PS] = 1.0 mM and [CN-800] = 0.2 g L<sup>-1</sup>; (b) [BPA] = 200 mg L<sup>-1</sup>, [PS] = 1.5 mM and [CN-800] = 0.2 g L<sup>-1</sup> at 25 ± 1 °C, pH = 9.0.

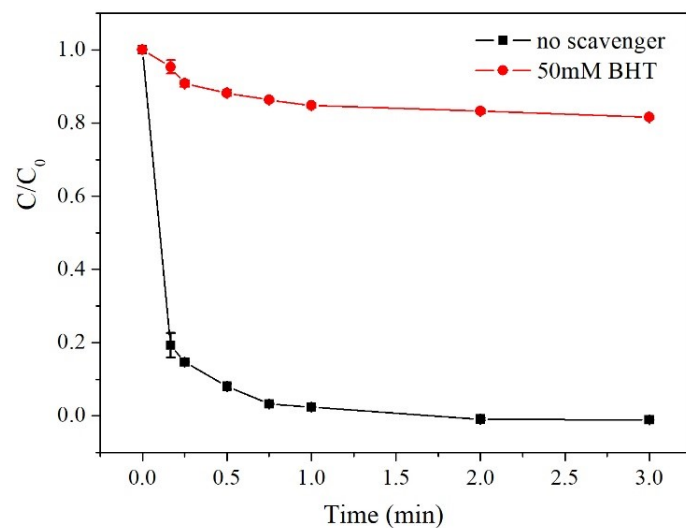

**Figure S5.** Oxidation of BPA in the presence of 50 mM BHT. Conditions: [BPA] = 20 mg L<sup>-1</sup>, [PS] = 1.0 mM and [CN-800] = 0.2 g L<sup>-1</sup> at 25 ± 1 °C, pH = 9.0.

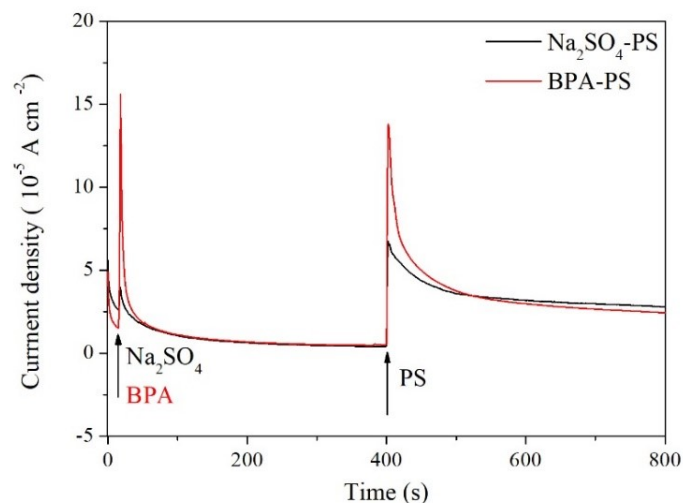

**Figure S6.** Chronoamperometric analysis at 0.00 V vs. SCE using 0.1 M  $\text{Na}_2\text{SO}_4$  as electrolyte.

**Table S4.** XPS analysis of the CN-T samples

| Samples        | XPS (at. %) |       |       | Fraction of different configuration nitrogen (%) |            |             |         |
|----------------|-------------|-------|-------|--------------------------------------------------|------------|-------------|---------|
|                | C           | N     | O     | Pyridinic-N                                      | Pyrrolic-N | Graphitic-N | Oxide-N |
| Before CN-600  | 62.72       | 31.44 | 5.84  | 44.78                                            | 43.28      | 11.94       | 0.00    |
| Before CN-800  | 83.34       | 8.59  | 8.07  | 41.44                                            | 27.62      | 27.07       | 3.87    |
| Before CN-1000 | 88.22       | 3.03  | 8.75  | 29.06                                            | 17.95      | 46.15       | 6.84    |
| After CN-600   | 65.38       | 26.02 | 8.60  | 35.10                                            | 38.37      | 18.17       | 8.16    |
| After CN-800   | 81.93       | 8.07  | 10.55 | 37.14                                            | 40.48      | 19.05       | 3.33    |
| After CN-1000  | 86.49       | 2.93  | 10.58 | 16.82                                            | 40.19      | 37.38       | 5.61    |



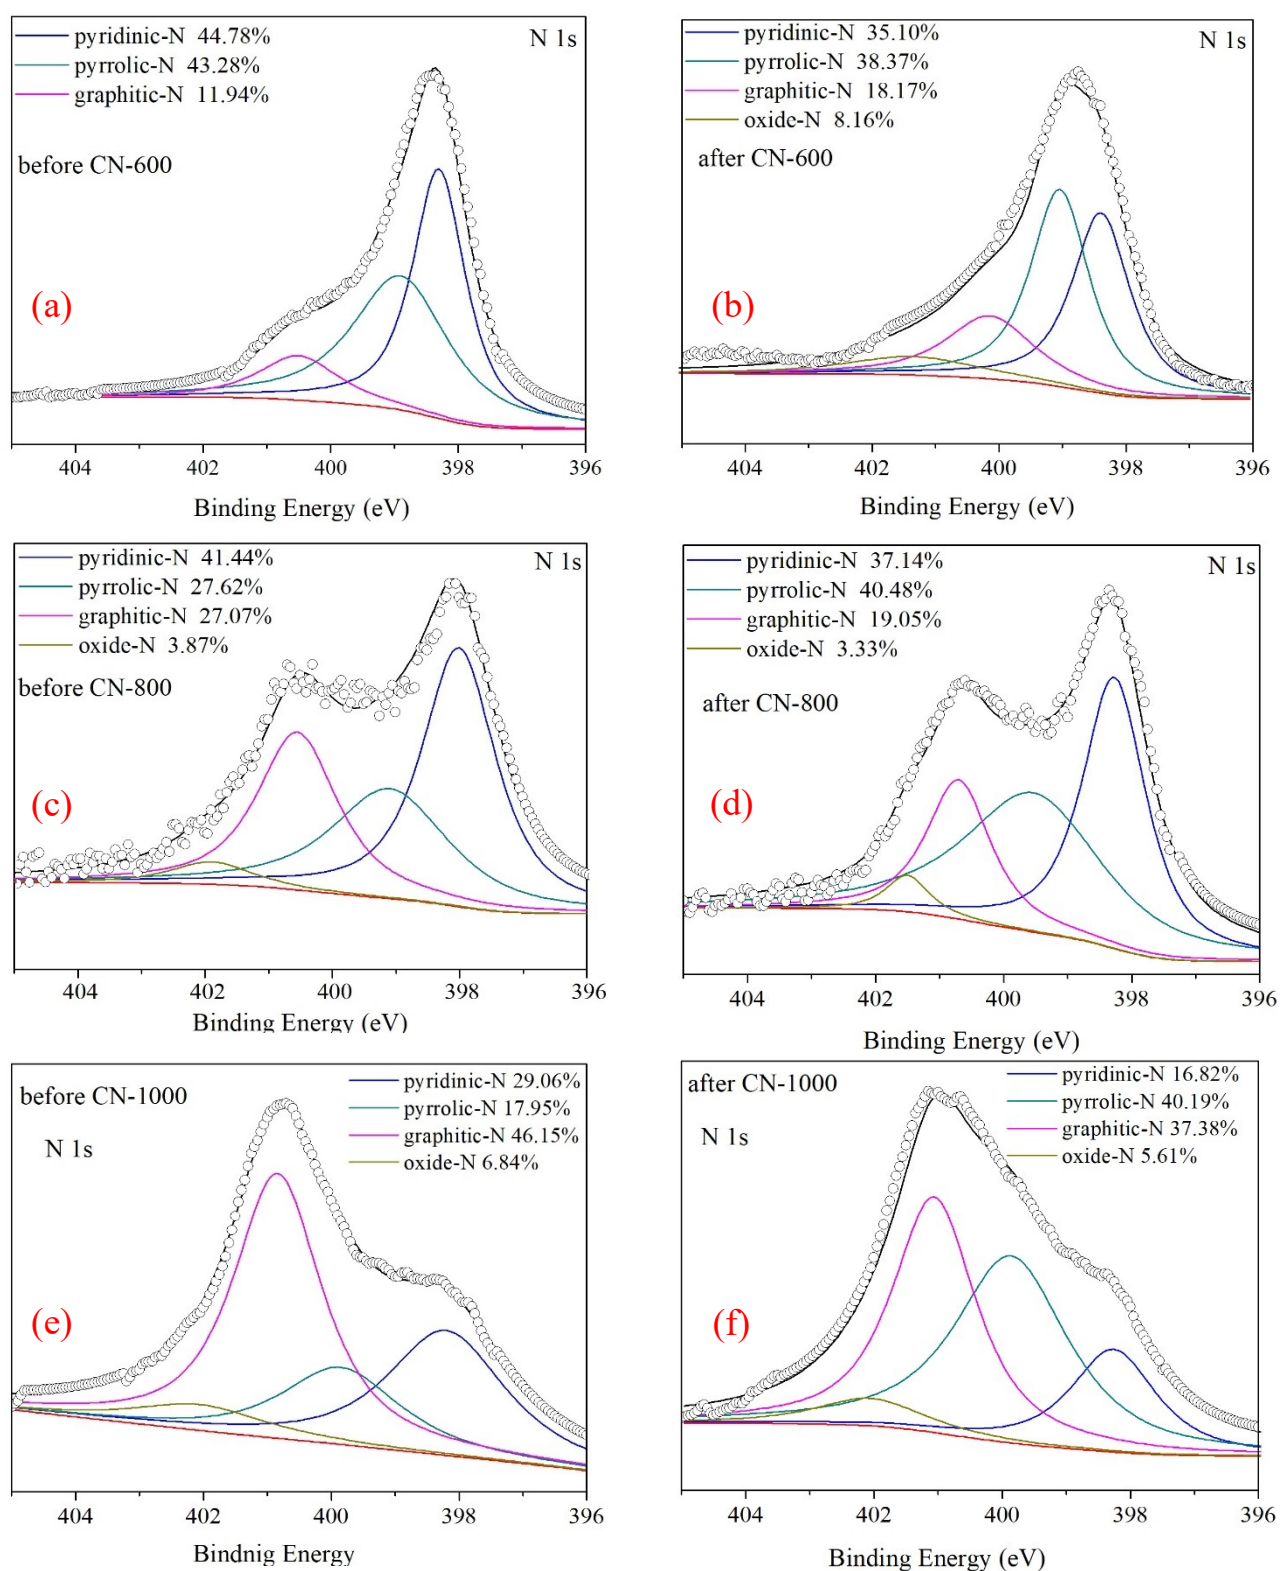

**Figure S7.** (a, c and e) XPS N 1s analysis of before CN catalyst; (b, d and f) XPS N 1s analysis of after CN catalyst.

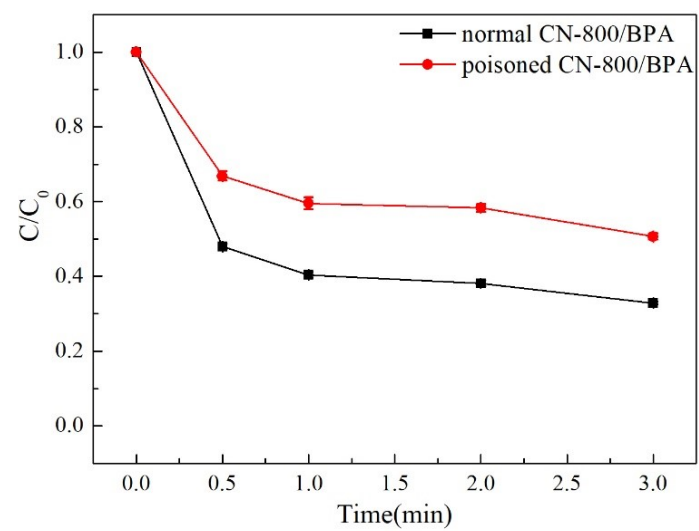

**Figure S8** Adsorption of BPA by normal/poisoned CN-800 at pH 9.0. Conditions:

[BPA] = 20 mg L<sup>-1</sup>, [catalyst] = 0.50 g L<sup>-1</sup> at 25 ± 1 °C.
